# Supplementary material
Source: MDPI journal article supplement (https://www.mdpi.com/2227-9040/9/11/310)
Supplement: s1 [file s1]

Communication

# “Green” Three-Electrode Sensors Fabricated by Injection-Moulding for On-Site Stripping Voltammetric Determination of Trace In(III) and Tl(I)

Maria Pitsou <sup>1</sup>, Christos Kokkinos <sup>1</sup>, Anastasios Economou <sup>1,\*</sup>, Peter R. Fielden <sup>2</sup>, Sara J. Baldock <sup>2</sup> and Nickolas J. Goddard <sup>3</sup>

<sup>1</sup> Laboratory of Analytical Chemistry, Department of Chemistry, National and Kapodistrian University of Athens, 157 71 Athens, Greece; chemarpi18@gmail.com (M.P.); christok@chem.uoa.gr (C.K.)

<sup>2</sup> Department of Chemistry, Lancaster University, Lancaster LA1 4YB, UK; p.fielden@lancaster.ac.uk (P.R.F.); s.baldock@lancaster.ac.uk (S.J.B.)

<sup>3</sup> Process Instruments (UK) Ltd., March Street, Burnley BB12 0BT, UK; nick.goddard@processinstruments.net

\* Correspondence: aeconomou@chem.uoa.gr; Tel.: +30-210-727-4298

## Supplementary Material

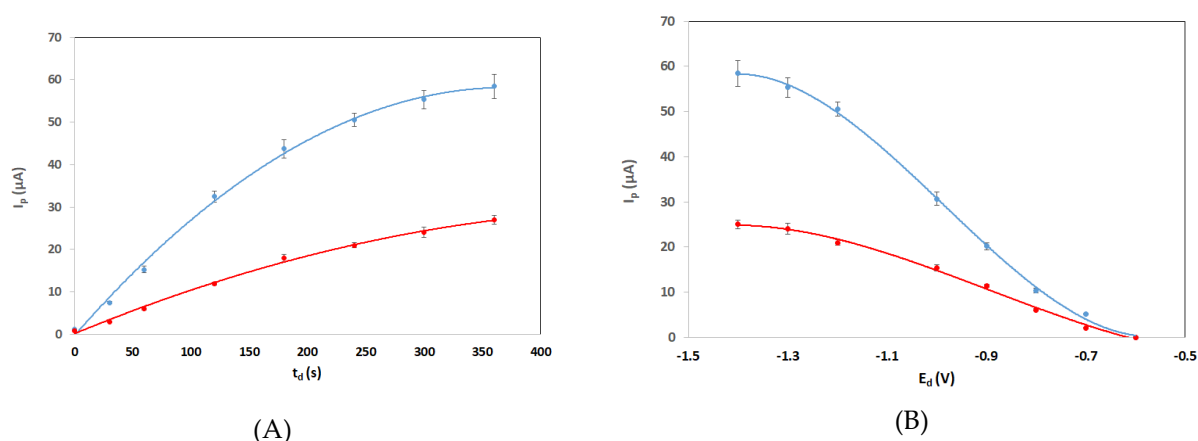

**Figure S1.** Effect of (A) the deposition time, (B) the deposition potential in the stripping peak heights of 50  $\mu g L^{-1}$  In(III) (blue traces) and 50  $\mu g L^{-1}$  Tl(I) (red traces). Conditions as in Table 1.

**Table S1.** Comparison of the LODs of the proposed sensors with existing electrodes modified with “green” metals.

| Target metal   | Electrode | LOD ( $\mu g L^{-1}$ )     | Reference |
|----------------|-----------|----------------------------|-----------|
| Tl(I)          | Bismuth   | 0.6                        | 18        |
| Tl(I)          | Bismuth   | 2.1                        | 17        |
| Tl(I)          | Tin       | 1.1                        | 16        |
| Tl(I), In(III) | Antimony  | 2 (Tl(I)), 8 (In(III))     | 19        |
| Tl(I), In(III) | Antimony  | 1.4 (Tl(I)), 2.4 (In(III)) | 20        |
| In(III)        | Antimony  | 1.6                        | 21        |
| Tl(I), In(III) | Bismuth   | 1.5 (Tl(I)), 1.2 (In(III)) | This work |
